# Supplementary material for: 100 years of lake evolution over the Qinghai–Tibet Plateau
Source: Copernicus journal article supplement (doi:10.5194/essd-13-3951-2021), 2021-08-13
Supplement: Supplementary file 1 [file essd-13-3951-2021-supplement.pdf]

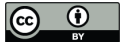

*Supplement of*

## **100 years of lake evolution over the Qinghai–Tibet Plateau**

**Guoqing Zhang et al.**

*Correspondence to:* Guoqing Zhang ([guoqing.zhang@itpcas.ac.cn](mailto:guoqing.zhang@itpcas.ac.cn)) and Youhua Ran ([ranyh@lzb.ac.cn](mailto:ranyh@lzb.ac.cn))

The copyright of individual parts of the supplement might differ from the article licence.

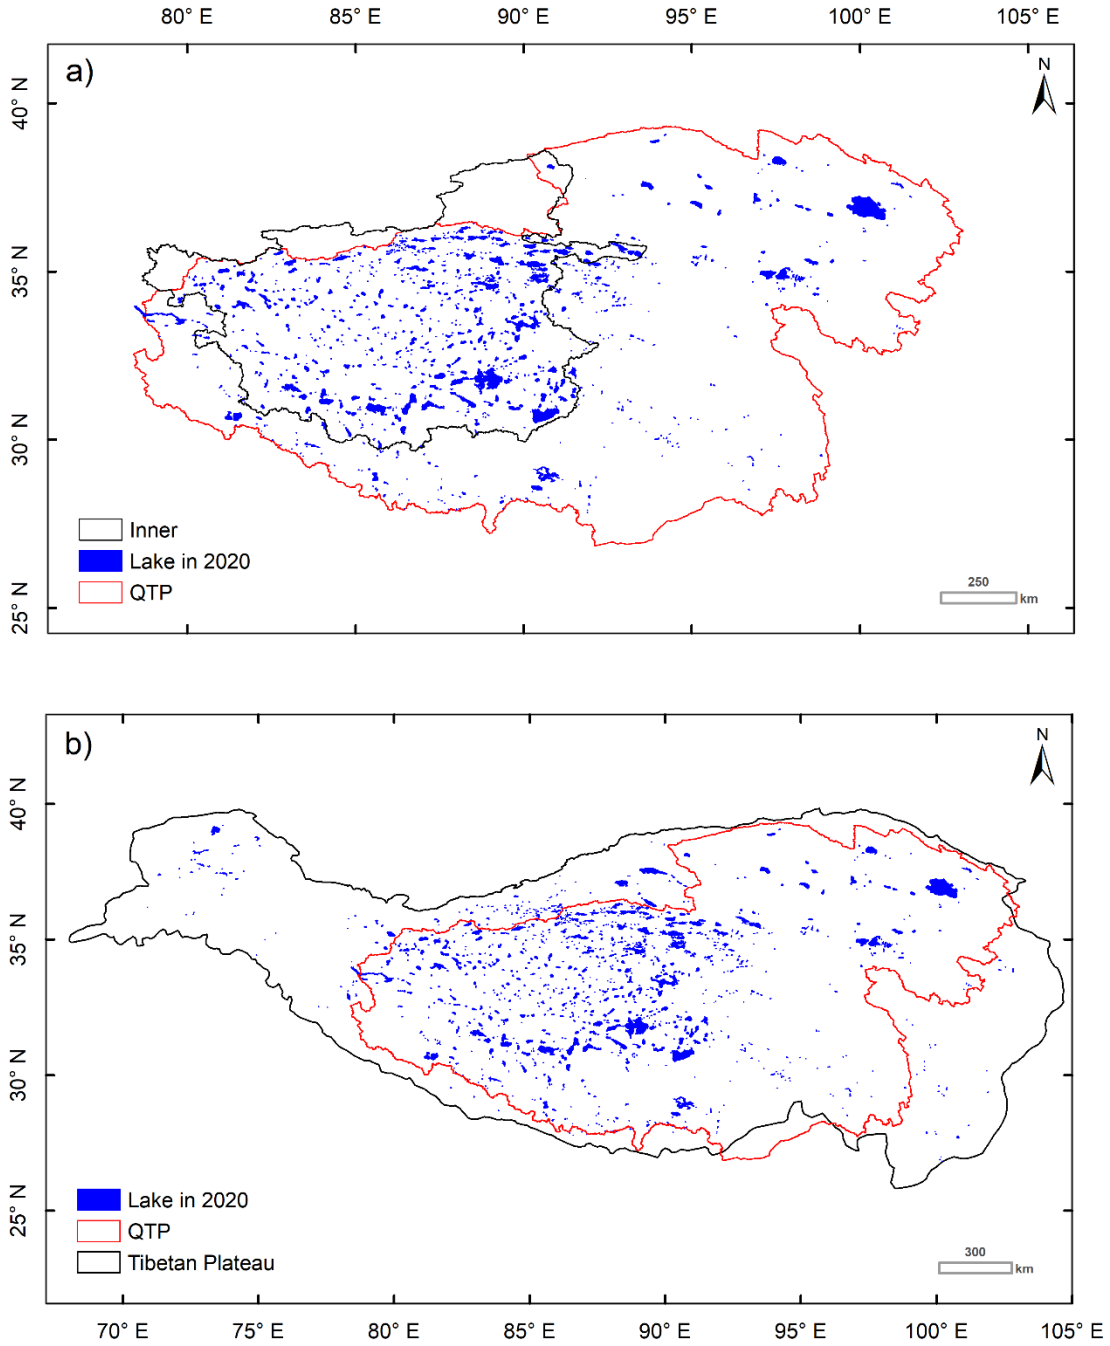

**Figure S1.** The differences of boundaries between QTP and TP. a) Lake distribution over the QTP. The boundary of Inner Plateau is also shown. b) Lake distribution over the TP. The boundary of QTP is also overlapped to differentiate between them.

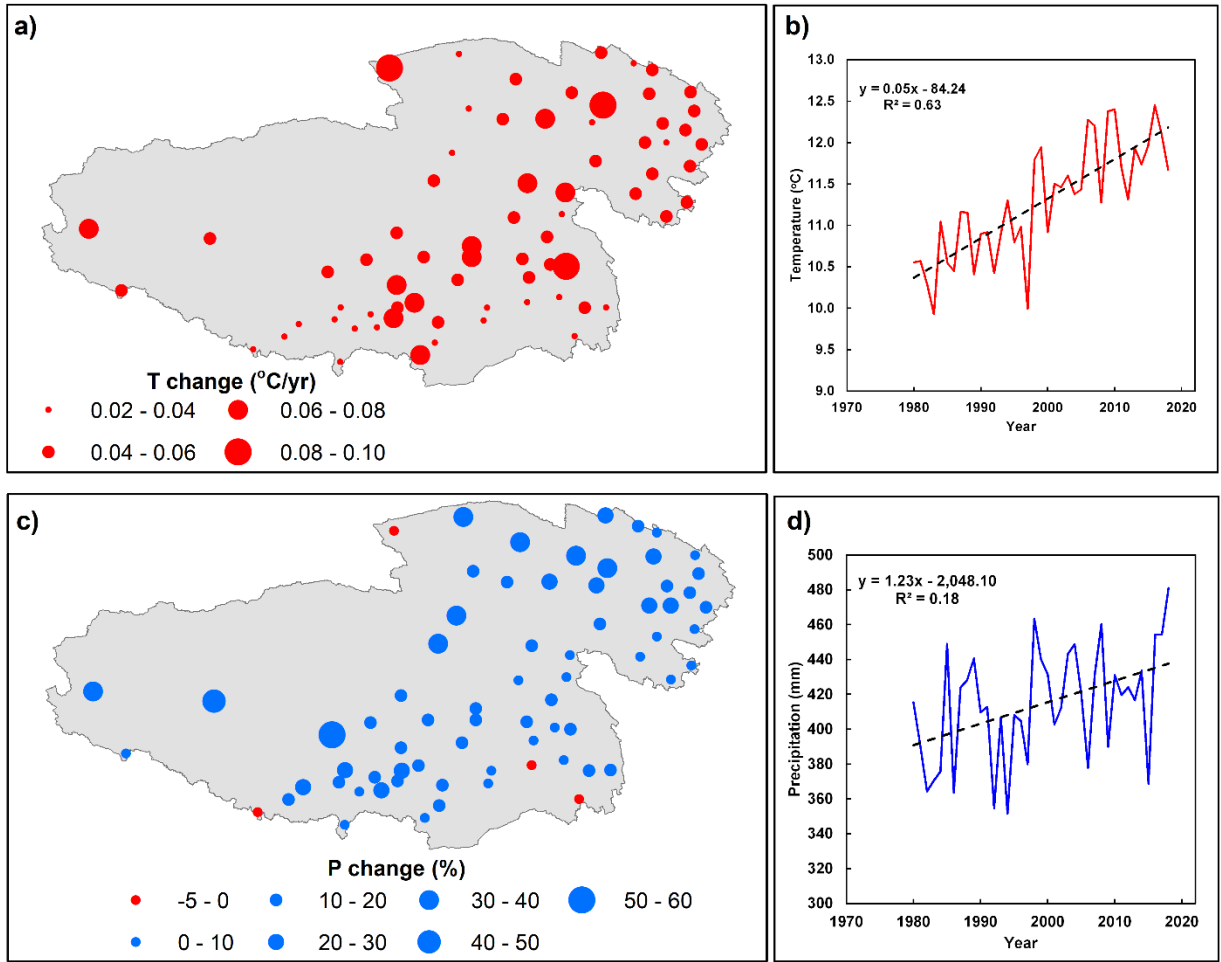

**Figure S2.** The changes in temperature (T) and precipitation (P) from CMA stations between 1980 and 2018. a) The spatial difference of temperature change. b) Time series of temperature change. c) The spatial difference of precipitation change. The difference of average between 1980–1998 and 1999–2018 was used. d) Time series of precipitation change.

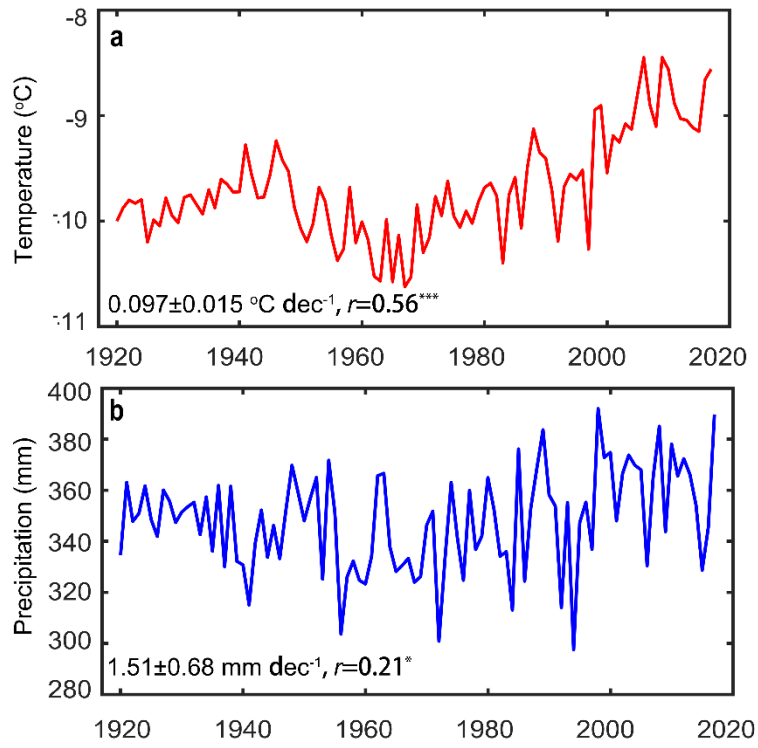

**Figure S3.** Time series of temperature and precipitation changes from 1920 to 2017.
